# Supplementary material for: Catalytic reduction of SO2 by Gd@CeOx catalysts: stability enhancement and structural modulation
Source: Royal Society of Chemistry journal article supplement (doi:10.1039/d4en01156b), 2025-01-01
Supplement: d4en01156b1.pdf [file d4en01156b1.pdf]

## Supporting information for

# Catalytic reduction of SO<sub>2</sub> by Gd@CeO<sub>x</sub> catalysts: Stability enhancement and structural modulation

Mutao Xu<sup>a,b</sup>, Xinpei Cheng<sup>a</sup>, Liguo Chen<sup>a</sup>, Qijie Jin<sup>a,c\*</sup>, Jian Yang<sup>b\*</sup>, Jing Song<sup>c</sup>,

Changcheng Zhou<sup>c</sup>, Jisai Chen<sup>d</sup>, Yongzhong Wang<sup>e</sup>, Haitao Xu<sup>a,c\*</sup>

*a. School of Environmental Science and Engineering, Nanjing Tech University,*

*Nanjing 210009, China*

*b. College of Materials Science and Engineering, Nanjing Tech University, Nanjing*

*210009, PR China*

*c. Nanjing Gekof Institute of Environmental Protection Technology & Equipment Co.,*

*Nanjing 210031, PR China*

*d. CSSC Luzhou Environment Protection (Nanjing) Co., Nanjing 211100, PR China*

*e. Kelin Environmental Protection Technology Co., Ltd., Suzhou 215200, PR China*

\* Corresponding authors: Haitao Xu, Jian Yang, Qijie Jin

E-mail address: [htxu@njtech.edu.cn](mailto:htxu@njtech.edu.cn), [yangjian1976@163.com](mailto:yangjian1976@163.com), [qijiejin@njtech.edu.cn](mailto:qijiejin@njtech.edu.cn)

## 1. Chemicals and Materials

All chemicals were purchased from commercial sources and used without further treatment.  $\text{Ce}(\text{NO}_3)_2 \cdot 6\text{H}_2\text{O}$ ,  $\text{Gd}(\text{NO}_3)_2 \cdot 6\text{H}_2\text{O}$  were purchased from Shanghai Macklin Biochemical Technology Co., LTD. The water used is deionized from laboratory preparation.

## 2. Catalytic activity and selectivity measurement

To determine the activity of the catalyst used for the reduction of  $\text{SO}_2$  by CO, 1 mL of catalyst was fixed in a quartz tube (inner diameter 15 mm, outer diameter 20 mm), and then the catalyst was pre-sulfurized by passing a mixture of gases into the reactor at a total gas flow rate of 400 mL/min (1%  $\text{SO}_2$ , 2% CO, and 97%  $\text{N}_2$ ), and the catalyst had to be pre-sulfurized at 500 °C for 2 h. Then the system was cooled down and cooled to 400 °C, and the mixture conditions were changed to test the catalyst activity, with the total gas flow rate still 400 mL/min (2500 ppm  $\text{SO}_2$ , 5000 ppm CO, and 99%  $\text{N}_2$ ). Then the system was cooled down to 400°C and the mixture conditions were changed to test the catalyst activity at a total gas flow rate of 400 mL/min (2500 ppm  $\text{SO}_2$ , 5000 ppm CO, 99.25 %  $\text{N}_2$ ). The exhaust gas was analyzed after cooling down to the target temperature and stabilizing for 30 min. The  $\text{SO}_2$  concentration at the inlet and outlet of the reactor was detected by a sulfur dioxide analyzer (HYP600, Shanghai Yidian Analytical Instrument Co., LTD) and the concentration of the main by-product COS in the exhaust gas was detected by gas chromatography (FPD detector, Trace1300, ThermoFisher Scientific).

The  $\text{SO}_2$  conversion (X), the selectivity ( $Y_S$ ) and the yield (Y) of monomeric sulfur are defined as follows.

$$X(\%) = \frac{[\text{SO}_2]_{in} - [\text{SO}_2]_{out}}{[\text{SO}_2]_{in}} * 100 \% \quad (2-1)$$

$$Y_S = \frac{[\text{SO}_2]_{in} - [\text{SO}_2]_{out} - [\text{COS}]_{out}}{[\text{SO}_2]_{in} - [\text{SO}_2]_{out}} \quad (2-2)$$

$$Y = XY_S \quad (2-3)$$

Among them,  $[\text{SO}_2]_{in}$  represented the  $\text{SO}_2$  concentration at inlet of the reactor,  $[\text{SO}_2]_{out}$  represented the  $\text{SO}_2$  concentration at outlet of the reactor, and  $[\text{COS}]_{out}$

represented the COS concentration at the outlet of the reactor.

### 3. Catalyst characterization and analysis methods

X-ray diffraction (XRD) patterns were obtained from an X-ray diffractometer (Smartlab TM 3 kW, Rigaku, Japan). The scan speed was  $10\text{ }^{\circ}\cdot\text{min}^{-1}$  and the  $2\theta$  scans covered  $10\sim 85\text{ }^{\circ}$ . The specific surface area and average pore diameter (BET method) of the samples were measured by  $\text{N}_2$  adsorption/desorption isotherms at  $-196\text{ }^{\circ}\text{C}$  using a surface-area analyzer (Micromeritics, 2020M V3.00H). All of the samples were degassed at  $350\text{ }^{\circ}\text{C}$  under vacuum for 3 h prior to the adsorption experiments. The microstructural natures of the catalysts have been investigated using a transmission electron microscopy (JEOL, JEM-2010UHR).

The temperature programmed desorption of ammonia ( $\text{NH}_3$ -TPD) was conducted on the CHEMBET-3000 (Quantachrome) to obtain the surface acid properties. All the catalysts were preheated at  $400\text{ }^{\circ}\text{C}$  under a helium stream for 1 h, and then cooled to  $50\text{ }^{\circ}\text{C}$  for the ammonia adsorption. Afterwards, ammonia was desorbed from  $50\text{ }^{\circ}\text{C}$  to  $800\text{ }^{\circ}\text{C}$  at a heating rate of  $10\text{ }^{\circ}\text{C}\cdot\text{min}^{-1}$ . The temperature programmed desorption of carbon dioxide ( $\text{CO}_2$ -TPD) was conducted on the CHEMBET-3000 (Quantachrome) to obtain the surface alkaline properties. All the catalysts were preheated at  $400\text{ }^{\circ}\text{C}$  under a helium stream for 1 h, and then cooled to  $50\text{ }^{\circ}\text{C}$  for the carbon dioxide adsorption. Afterwards, carbon dioxide was desorbed from  $50\text{ }^{\circ}\text{C}$  to  $800\text{ }^{\circ}\text{C}$  at a heating rate of  $10\text{ }^{\circ}\text{C}\cdot\text{min}^{-1}$ . The Semiautomatic Micromeritics TPD/TPR 2900 instrument was used for the temperature programmed reduction of hydrogen ( $\text{H}_2$ -TPR). All the catalyst carriers were preheated to  $400\text{ }^{\circ}\text{C}$  under an argon stream for 1 h, and cooled to  $50\text{ }^{\circ}\text{C}$ . Then 5%  $\text{H}_2/\text{Ar}$  flow was switched, and the temperature increased from  $50\text{ }^{\circ}\text{C}$  to  $800\text{ }^{\circ}\text{C}$  at a  $10\text{ }^{\circ}\text{C}\cdot\text{min}^{-1}$  heating rate. The data were collected throughout the whole temperature range.

*In-situ* Diffuse Reflectance Infrared Fourier Transform Spectra (*in situ* DRIFTS) were also collected by a Nicolet IS50 spectrometer. 1%  $\text{SO}_2$  was pumped into the system for 10 min when the temperature was  $350\text{ }^{\circ}\text{C}$ . Then stop entering  $\text{SO}_2$  was stopped and 2%  $\text{CO}$  was pumped into the system for 10 min. Finally, 1%  $\text{SO}_2$  and 2%

CO were pumped together into the system for 10 min.
